# Supplementary material for: One-dimensional polymeric iodoplumbate hybrids with lanthanide complex cations: syntheses, crystal structures, and photoelectric and photocatalytic properties
Source: Royal Society of Chemistry journal article supplement (doi:10.1039/d0nj04549g), 2020-01-01
Supplement: d0nj04549g1.pdf [file d0nj04549g1.pdf]

## Electronic Supplementary Information

# One-dimensional polymeric iodoplumbate hybrids with lanthanide complex cations: syntheses, crystal structures, photoelectric and photocatalytic properties

Niannian Chen,<sup>[a]</sup> Yan Gao,<sup>[a]</sup> Yiming Tian,<sup>[a]</sup> Bing Wu,<sup>[a]</sup> Dingxian Jia<sup>[a],\*</sup>, Shengxian Zhao<sup>[b],\*</sup>

<sup>[a]</sup>College of Chemistry, Chemical Engineering and Materials Science, Soochow University, Suzhou 215123, China

<sup>[b]</sup>College of Science and Technology, Ningbo University, Cixi 315302, China.

## Table of Contents

|                                                                                                                                                                                                                                         |      |
|-----------------------------------------------------------------------------------------------------------------------------------------------------------------------------------------------------------------------------------------|------|
| 1. Table S1. Crystallographic data and refinement of <b>1–3</b> .                                                                                                                                                                       | S2   |
| 2. Table S2. Selected Bond Lengths (Å) and Angles (deg) for <b>1</b>                                                                                                                                                                    | S2   |
| 3. Table S3. Selected Bond Lengths (Å) and Angles (deg) for <b>2</b>                                                                                                                                                                    | S4   |
| 4. Table S4. Selected Bond Lengths (Å) and Angles (deg) for <b>3</b>                                                                                                                                                                    | S6   |
| 5. Table S5. Hydrogen Bond Lengths (Å) and Angles (deg) for <b>1-3</b>                                                                                                                                                                  | S8   |
| 6. Fig. S1 (a) Crystal structure of the [La(DMF) <sub>8</sub> ] <sup>3+</sup> with the labelling scheme in <b>1</b> . (b) The dicapped trigonal prism LaO <sub>8</sub> of in the [La(DMF) <sub>8</sub> ] <sup>3+</sup> complex cation.  | S9   |
| 7. Fig. S2. (a) Crystal structure of the 1-D [Pb <sub>3</sub> I <sub>9</sub> ] <sub>n</sub> <sup>3n-</sup> chain in <b>1</b> viewed along the <i>b</i> (a) and <i>a</i> (b) axis.                                                       | S10  |
| 8. Fig. S3. (a) Crystal structure of the [Sm(DMF) <sub>8</sub> ] <sup>3+</sup> with the labelling scheme in <b>2</b> . (b) The dicapped trigonal prism SmO <sub>8</sub> of in the [Sm(DMF) <sub>8</sub> ] <sup>3+</sup> complex cation. | S10  |
| 9. Fig. S4. Packing diagram of <b>2</b> viewed along the <i>c</i> axis. Yellow octahedron: Pbl <sub>6</sub> .                                                                                                                           | S10  |
| 10. Fig. S5. The photocurrent response behaviours of <b>1</b> (a), <b>2</b> (b) and <b>3</b> (c).                                                                                                                                       | S11  |
| 11. Fig. S6. Time dependent absorption spectra of CV solution with photodegradation catalyzed by compounds <b>1</b> (a), <b>2</b> (b), <b>3</b> (c) and Pbl <sub>2</sub> (d).                                                           | S12  |
| 12. Fig. S7. The linear relationship of ln(C <sub>0</sub> /C) via reaction time over compounds <b>1</b> (a), <b>2</b> (b), <b>3</b> (c).                                                                                                | S12  |
| 13. Fig. S8. Time dependent absorption spectra of CV solution with photodegradation catalyzed by compound <b>2</b> in the presence of BQ (a), AO (b), and TBA (c).                                                                      | S13  |
| 14. Fig. S9. The linear relationship of ln(C <sub>0</sub> /C) over reaction time over compounds <b>1</b> , <b>2</b> and <b>3</b> in the photodegradation of MB.                                                                         | S13  |
| 15 Fig. S10. Proposed reaction mechanism for photocatalytic degradation of CV over catalyst <b>2</b> under visible light irradiation.                                                                                                   | S14  |
| 16. Fig. S11. Simulated and experimental powder XRD patterns of compounds <b>1</b> (a), and <b>2</b> (b).                                                                                                                               | S15. |

17. Fig. S12. Proposed reaction mechanism for photocatalytic degradation of CV over catalyst **2** under visible light irradiation. S15.
18. Fig. S13. IR spectrum of complex **1**. S16
19. Fig. S14. IR spectrum of complex **2**. S16
20. Fig. S14. IR spectrum of complex **3**. S16
21. Fig. S16. TGA curves of compounds **1** (left), and **2** (right). S17

**Table S1.** Crystallographic data and refinement of **1–3**.

|                                                      | <b>1</b>                                                                                       | <b>2</b>                                                                                        | <b>3</b>                                                                                        |
|------------------------------------------------------|------------------------------------------------------------------------------------------------|-------------------------------------------------------------------------------------------------|-------------------------------------------------------------------------------------------------|
| Empirical formula                                    | C <sub>24</sub> H <sub>56</sub> N <sub>8</sub> O <sub>8</sub> LaPb <sub>3</sub> I <sub>9</sub> | C <sub>24</sub> H <sub>56</sub> N <sub>8</sub> O <sub>8</sub> SmPb <sub>5</sub> I <sub>13</sub> | C <sub>24</sub> H <sub>56</sub> N <sub>8</sub> O <sub>8</sub> GdPb <sub>5</sub> I <sub>13</sub> |
| FW                                                   | 2487.34                                                                                        | 3420.76                                                                                         | 3427.66                                                                                         |
| Crystal system                                       | Monoclinic                                                                                     | Monoclinic                                                                                      | Monoclinic                                                                                      |
| Space group                                          | <i>P</i> 2 <sub>1</sub> / <i>c</i>                                                             | <i>P</i> 2 <sub>1</sub> / <i>n</i>                                                              | <i>P</i> 2 <sub>1</sub> / <i>n</i>                                                              |
| <i>a</i> [Å]                                         | 19.497(4)                                                                                      | 18.833(4)                                                                                       | 18.777(4)                                                                                       |
| <i>b</i> [Å]                                         | 17.505(4)                                                                                      | 20.148(4)                                                                                       | 20.133(4)                                                                                       |
| <i>c</i> [Å]                                         | 17.664(4)                                                                                      | 20.148(4)                                                                                       | 20.095(4)                                                                                       |
| $\alpha$ [°]                                         | 90                                                                                             | 90                                                                                              | 90                                                                                              |
| $\gamma$ [°]                                         | 97.67(3)                                                                                       | 110.01(3)                                                                                       | 109.89(3)                                                                                       |
| $\beta$ [°]                                          | 90                                                                                             | 90                                                                                              | 90                                                                                              |
| <i>V</i> [Å <sup>3</sup> ]                           | 5975(2)                                                                                        | 7183(3)                                                                                         | 7143(3)                                                                                         |
| <i>Z</i>                                             | 4                                                                                              | 4                                                                                               | 4                                                                                               |
| <i>T</i> [K]                                         | 293(2)                                                                                         | 293(2)                                                                                          | 293(2)                                                                                          |
| D <sub>c</sub> /Mg m <sup>-3</sup>                   | 2.765                                                                                          | 3.163                                                                                           | 3.187                                                                                           |
| <i>F</i> (000)                                       | 4400                                                                                           | 5924                                                                                            | 5932                                                                                            |
| 2 $\theta$ (max) [°]                                 | 50.70                                                                                          | 50.70                                                                                           | 50.70                                                                                           |
| Measured reflns                                      | 26521                                                                                          | 31821                                                                                           | 67875                                                                                           |
| Unique reflns                                        | 7277                                                                                           | 8745                                                                                            | 9452                                                                                            |
| R <sub>int</sub>                                     | 0.0869                                                                                         | 0.1185                                                                                          | 0.1526                                                                                          |
| No. of parameters                                    | 393                                                                                            | 432                                                                                             | 455                                                                                             |
| R <sub>1</sub> [ <i>I</i> > 2 $\sigma$ ( <i>I</i> )] | 0.0896                                                                                         | 0.1154                                                                                          | 0.1211                                                                                          |
| wR <sub>2</sub> (all data)                           | 0.1613                                                                                         | 0.2272                                                                                          | 0.2357                                                                                          |
| GOF on <i>F</i> <sup>2</sup>                         | 1.158                                                                                          | 1.185                                                                                           | 1.282                                                                                           |

**Table S2.** Selected Bond Lengths (Å) and Angles (deg) for **1**

|              |            |              |            |
|--------------|------------|--------------|------------|
| Pb(1)–I(1)   | 3.3045(16) | Pb(1)–I(2)   | 3.260(2)   |
| Pb(1)–I(3)   | 3.031(2)   | Pb(1)–I(4)   | 3.1488(17) |
| Pb(1)–I(5)   | 3.2717(19) | Pb(1)–I(9)   | 3.487(2)   |
| Pb(2)–I(1)   | 3.615(2)   | Pb(2)–I(6)   | 3.2478(18) |
| Pb(2)–I(2)   | 3.2253(19) | Pb(2)–I(8)   | 3.016(2)   |
| Pb(2)–I(7)   | 3.2041(17) | Pb(2)–I(9)#2 | 3.2719(16) |
| Pb(3)–I(4)#1 | 3.2190(17) | Pb(3)–I(1)   | 3.2098(18) |
| Pb(3)–I(6)   | 3.250(2)   | Pb(3)–I(5)#1 | 3.189(2)   |

|                     |            |                    |            |
|---------------------|------------|--------------------|------------|
| Pb(3)–I(9)          | 3.2182(17) | Pb(3)–I(7)         | 3.2817(17) |
| La(1)–O(2)          | 2.463(14)  | La(1)–O(1)         | 2.514(16)  |
| La(1)–O(4)          | 2.520(2)   | La(1)–O(3)         | 2.442(17)  |
| La(1)–O(6)          | 2.450(14)  | La(1)–O(5)         | 2.505(14)  |
| La(1)–O(8)          | 2.485(19)  | La(1)–O(7)         | 2.483(16)  |
|                     |            |                    |            |
| I(1)–Pb(1)–I(2)     | 86.81(4)   | I(1)–Pb(1)–I(3)    | 98.19(6)   |
| I(1)–Pb(1)–I(4)     | 168.46(5)  | I(1)–Pb(1)–I(5)    | 92.14(4)   |
| I(2)–Pb(1)–I(3)     | 93.10(6)   | I(2)–Pb(1)–I(4)    | 92.06(5)   |
| I(2)–Pb(1)–I(5)     | 164.38(5)  | I(3)–Pb(1)–I(4)    | 93.34(6)   |
| I(3)–Pb(1)–I(5)     | 102.46(6)  | I(4)–Pb(1)–I(5)    | 85.85(4)   |
| I(1)–Pb(2)–I(2)     | 82.31(5)   | I(1)–Pb(2)–I(6)    | 84.14(4)   |
| I(1)–Pb(2)–I(7)     | 82.99(5)   | I(1)–Pb(2)–I(8)    | 175.85(5)  |
| I(1)–Pb(2)–I(9)#2   | 84.70(5)   | I(2)–Pb(2)–I(6)    | 166.45(6)  |
| I(2)–Pb(2)–I(7)     | 93.44(5)   | I(2)–Pb(2)–I(8)    | 93.97(6)   |
| I(2)–Pb(2)–I(9)#2   | 87.05(5)   | I(6)–Pb(2)–I(7)    | 85.16(4)   |
| I(6)–Pb(2)–I(8)     | 99.56(6)   | I(6)–Pb(2)–I(9)#2  | 91.44(4)   |
| I(7)–Pb(2)–I(8)     | 99.13(6)   | I(7)–Pb(2)–I(9)#2  | 167.50(5)  |
| I(8)–Pb(2)–I(9)#2   | 93.29(6)   | I(1)–Pb(3)–I(4)#1  | 91.77(4)   |
| I(1)–Pb(3)–I(5)#1   | 91.44(5)   | I(1)–Pb(3)–I(6)    | 90.98(5)   |
| I(1)–Pb(3)–I(7)     | 88.47(4)   | I(1)–Pb(3)–I(9)    | 176.90(5)  |
| I(4)#1–Pb(3)–I(5)#1 | 86.08(5)   | I(4)#1–Pb(3)–I(6)  | 90.95(5)   |
| I(4)#1–Pb(3)–I(7)   | 174.83(5)  | I(4)#1–Pb(3)–I(9)  | 85.47(4)   |
| I(5)#1–Pb(3)–I(6)   | 176.22(5)  | I(5)#1–Pb(3)–I(7)  | 99.08(5)   |
| I(5)#1–Pb(3)–I(9)   | 86.97(5)   | I(6)–Pb(3)–I(7)    | 83.88(5)   |
| I(6)–Pb(3)–I(9)     | 90.47(5)   | I(7)–Pb(3)–I(9)    | 94.41(4)   |
| Pb(1)–I(1)–Pb(2)    | 74.67(4)   | Pb(1)–I(1)–Pb(3)   | 147.72(6)  |
| Pb(2)–I(1)–Pb(3)    | 73.06(4)   | Pb(1)–I(2)–Pb(2)   | 80.81(4)   |
| Pb(1)–I(4)–Pb(3)#2  | 79.95(4)   | Pb(1)–I(5)–Pb(3)#2 | 78.58(4)   |
| Pb(2)–I(6)–Pb(3)    | 77.70(4)   | Pb(2)–I(7)–Pb(3)   | 77.86(4)   |
| Pb(2)#1–I(9)–Pb(3)  | 151.79(6)  | O(1)–La(1)–O(2)    | 71.8(5)    |
| O(1)–La(1)–O(3)     | 143.9(5)   | O(1)–La(1)–O(4)    | 131.8(7)   |
| O(1)–La(1)–O(5)     | 124.7(5)   | O(1)–La(1)–O(6)    | 72.0(5)    |
| O(1)–La(1)–O(7)     | 77.8(6)    | O(1)–La(1)–O(8)    | 76.3(7)    |
| O(2)–La(1)–O(3)     | 72.2(5)    | O(2)–La(1)–O(4)    | 130.2(6)   |
| O(2)–La(1)–O(5)     | 133.2(6)   | O(2)–La(1)–O(6)    | 143.0(5)   |
| O(2)–La(1)–O(7)     | 75.7(5)    | O(2)–La(1)–O(8)    | 73.6(6)    |
| O(3)–La(1)–O(4)     | 76.2(8)    | O(3)–La(1)–O(5)    | 79.6(5)    |
| O(3)–La(1)–O(6)     | 144.1(5)   | O(3)–La(1)–O(7)    | 96.3(6)    |
| O(3)–La(1)–O(8)     | 90.7(8)    | O(4)–La(1)–O(5)    | 75.0(6)    |
| O(4)–La(1)–O(6)     | 72.4(7)    | O(4)–La(1)–O(7)    | 70.5(6)    |
| O(4)–La(1)–O(8)     | 144.4(7)   | O(5)–La(1)–O(6)    | 75.8(5)    |

|                   |           |                   |           |
|-------------------|-----------|-------------------|-----------|
| O(5)–La(1)–O(7)   | 145.3(5)  | O(5)–La(1)–O(8)   | 70.1(6)   |
| O(6)–La(1)–O(7)   | 89.4(5)   | O(6)–La(1)–O(8)   | 104.8(7)  |
| O(7)–La(1)–O(8)   | 144.6(6)  | La(1)–O(1)–C(1)   | 140.7(16) |
| La(1)–O(2)–C(4A)  | 148(2)    | La(1)–O(2)–C(4B)  | 145(2)    |
| La(1)–O(3)–C(7)   | 144.3(19) | La(1)–O(4)–C(10)  | 136(2)    |
| La(1)–O(5)–C(13)  | 150.2(16) | La(1)–O(6)–C(16)  | 134.7(16) |
| La(1)–O(7)–C(19)  | 150.5(14) | La(1)–O(8)–C(22A) | 149(3)    |
| La(1)–O(8)–C(22B) | 128(4)    |                   |           |

Symmetry transformations used to generate equivalent atoms: #1  $x, -y+3/2, z-1/2$ ; #2  $x, -y+3/2, z+1/2$ .

**Table S3.** Selected Bond Lengths (Å) and Angles (deg) for **2**

|                 |           |                   |           |
|-----------------|-----------|-------------------|-----------|
| Pb(1)–I(1)      | 3.259(3)  | Pb(1)–I(2)        | 3.348(2)  |
| Pb(1)–I(2)#1    | 3.391(2)  | Pb(1)–I(3)        | 3.160(3)  |
| Pb(1)–I(4)      | 3.132(3)  | Pb(1)–I(5)        | 3.172(3)  |
| Pb(2)–I(1)      | 3.205(3)  | Pb(2)–I(2)        | 3.461(3)  |
| Pb(2)–I(3)      | 3.207(3)  | Pb(2)–I(6)        | 3.320(2)  |
| Pb(2)–I(7)      | 3.103(3)  | Pb(2)–I(8)        | 3.224(3)  |
| Pb(3)–I(2)      | 3.310(2)  | Pb(3)–I(4)#1      | 3.231(3)  |
| Pb(3)–I(5)#1    | 3.202(3)  | Pb(3)–I(6)        | 3.271(2)  |
| Pb(3)–I(9)      | 3.207(3)  | Pb(3)–I(10)       | 3.121(2)  |
| Pb(4)–I(6)      | 3.741(3)  | Pb(4)–I(9)        | 3.152(3)  |
| Pb(4)–I(10)     | 3.187(2)  | Pb(4)–I(11)       | 3.410(3)  |
| Pb(4)–I(12)     | 2.943(3)  | Pb(4)–I(13)#2     | 3.296(3)  |
| Pb(5)–I(6)      | 3.385(2)  | Pb(5)–I(7)        | 3.311(3)  |
| Pb(5)–I(8)      | 3.146(3)  | Pb(5)–I(11)       | 3.246(3)  |
| Pb(5)–I(11)#2   | 3.346(3)  | Pb(5)–I(13)       | 3.084(3)  |
| Sm(1)–O(1)      | 2.31(2)   | Sm(1)–O(2)        | 2.38(2)   |
| Sm(1)–O(3)      | 2.34(2)   | Sm(1)–O(4)        | 2.43(2)   |
| Sm(1)–O(5)      | 2.377(19) | Sm(1)–O(6)        | 2.28(2)   |
| Sm(1)–O(7)      | 2.39(3)   | Sm(1)–O(8)        | 2.36(3)   |
|                 |           |                   |           |
| I(1)–Pb(1)–I(2) | 88.65(7)  | I(1)–Pb(1)–I(2)#1 | 92.39(7)  |
| I(1)–Pb(1)–I(3) | 85.66(7)  | I(1)–Pb(1)–I(4)   | 94.95(7)  |
| I(1)–Pb(1)–I(5) | 174.51(8) | I(2)–Pb(1)–I(2)#1 | 91.45(6)  |
| I(2)–Pb(1)–I(3) | 86.68(7)  | I(2)#1–Pb(1)–I(3) | 177.32(7) |
| I(2)–Pb(1)–I(4) | 175.94(7) | I(2)#1–Pb(1)–I(4) | 86.55(7)  |
| I(2)–Pb(1)–I(5) | 87.76(6)  | I(2)#1–Pb(1)–I(5) | 83.55(7)  |
| I(3)–Pb(1)–I(4) | 95.44(8)  | I(3)–Pb(1)–I(5)   | 98.28(7)  |
| I(4)–Pb(1)–I(5) | 88.51(7)  | I(1)–Pb(2)–I(2)   | 87.59(6)  |
| I(1)–Pb(2)–I(3) | 85.78(7)  | I(1)–Pb(2)–I(6)   | 95.22(7)  |
| I(1)–Pb(2)–I(7) | 98.57(7)  | I(1)–Pb(2)–I(8)   | 174.75(8) |

|                     |           |                     |           |
|---------------------|-----------|---------------------|-----------|
| I(2)–Pb(2)–I(3)     | 84.06(7)  | I(2)–Pb(2)–I(6)     | 91.07(6)  |
| I(2)–Pb(2)–I(7)     | 173.72(7) | I(2)–Pb(2)–I(8)     | 87.49(7)  |
| I(3)–Pb(2)–I(6)     | 174.98(7) | I(3)–Pb(2)–I(7)     | 97.55(8)  |
| I(3)–Pb(2)–I(8)     | 95.51(7)  | I(6)–Pb(2)–I(7)     | 87.17(7)  |
| I(6)–Pb(2)–I(8)     | 83.06(6)  | I(7)–Pb(2)–I(8)     | 86.32(7)  |
| I(2)–Pb(3)–I(4)#1   | 86.32(7)  | I(2)–Pb(3)–I(5)#1   | 84.40(6)  |
| I(2)–Pb(3)–I(6)     | 94.69(6)  | I(2)–Pb(3)–I(9)     | 93.49(7)  |
| I(2)–Pb(3)–I(10)    | 177.36(7) | I(4)#1–Pb(3)–I(5)#1 | 86.29(7)  |
| I(4)#1–Pb(3)–I(6)   | 178.94(7) | I(4)#1–Pb(3)–I(9)   | 92.56(7)  |
| I(4)#1–Pb(3)–I(10)  | 94.81(7)  | I(5)#1–Pb(3)–I(6)   | 93.48(7)  |
| I(5)#1–Pb(3)–I(9)   | 177.66(8) | I(5)#1–Pb(3)–I(10)  | 93.28(7)  |
| I(6)–Pb(3)–I(9)     | 87.70(7)  | I(6)–Pb(3)–I(10)    | 84.17(6)  |
| I(9)–Pb(3)–I(10)    | 88.84(7)  | I(6)–Pb(4)–I(9)     | 80.75(7)  |
| I(6)–Pb(4)–I(10)    | 75.95(6)  | I(6)–Pb(4)–I(11)    | 83.84(6)  |
| I(6)–Pb(4)–I(12)    | 167.27(8) | I(6)–Pb(4)–I(13)#2  | 96.17(7)  |
| I(9)–Pb(4)–I(10)    | 88.65(7)  | I(9)–Pb(4)–I(11)    | 89.57(7)  |
| I(9)–Pb(4)–I(12)    | 94.54(10) | I(9)–Pb(4)–I(13)#2  | 175.83(8) |
| I(10)–Pb(4)–I(11)   | 159.74(7) | I(10)–Pb(4)–I(12)   | 92.20(8)  |
| I(10)–Pb(4)–I(13)#2 | 93.36(7)  | I(11)–Pb(4)–I(12)   | 108.06(8) |
| I(11)–Pb(4)–I(13)#2 | 87.29(7)  | I(12)–Pb(4)–I(13)#2 | 89.04(10) |
| I(6)–Pb(5)–I(7)     | 82.84(6)  | I(6)–Pb(5)–I(8)     | 83.19(7)  |
| I(6)–Pb(5)–I(11)    | 92.33(7)  | I(6)–Pb(5)–I(11)#2  | 87.97(6)  |
| I(6)–Pb(5)–I(13)    | 171.75(8) | I(7)–Pb(5)–I(8)     | 84.16(7)  |
| I(7)–Pb(5)–I(11)    | 174.97(7) | I(7)–Pb(5)–I(11)#2  | 98.12(7)  |
| I(7)–Pb(5)–I(13)    | 88.99(8)  | I(8)–Pb(5)–I(11)    | 93.90(7)  |
| I(8)–Pb(5)–I(11)#2  | 170.54(7) | I(8)–Pb(5)–I(13)    | 97.23(7)  |
| I(11)–Pb(5)–I(11)#2 | 83.06(7)  | I(11)–Pb(5)–I(13)   | 95.86(8)  |
| I(11)#2–Pb(5)–I(13) | 92.00(7)  | Pb(1)–I(1)–Pb(2)    | 76.59(6)  |
| Pb(1)–I(2)–Pb(1)#1  | 88.55(6)  | Pb(1)–I(2)–Pb(2)    | 72.05(5)  |
| Pb(1)#1–I(2)–Pb(2)  | 130.71(7) | Pb(1)–I(2)–Pb(3)    | 130.19(7) |
| Pb(1)#1–I(2)–Pb(3)  | 73.09(5)  | Pb(2)–I(2)–Pb(3)    | 85.57(6)  |
| Pb(1)–I(3)–Pb(2)    | 77.97(6)  | Pb(1)–I(4)–Pb(3)#1  | 77.66(6)  |
| Pb(1)–I(5)–Pb(3)#1  | 77.53(6)  | Pb(2)–I(6)–Pb(3)    | 88.54(6)  |
| Pb(2)–I(6)–Pb(4)    | 134.92(7) | Pb(2)–I(6)–Pb(5)    | 75.26(5)  |
| Pb(3)–I(6)–Pb(4)    | 71.46(5)  | Pb(3)–I(6)–Pb(5)    | 130.84(7) |
| Pb(4)–I(6)–Pb(5)    | 87.80(6)  | Pb(2)–I(7)–Pb(5)    | 79.25(6)  |
| Pb(2)–I(8)–Pb(5)    | 79.97(6)  | Pb(3)–I(9)–Pb(4)    | 80.59(6)  |
| Pb(3)–I(10)–Pb(4)   | 81.38(6)  | Pb(4)–I(11)–Pb(5)   | 96.02(7)  |
| Pb(4)–I(11)–Pb(5)#2 | 87.09(7)  | Pb(4)–I(11)–Pb(5)#2 | 96.93(7)  |
| Pb(4)#2–I(13)–Pb(5) | 93.62(7)  | O(1)–Sm(1)–O(2)     | 70.2(8)   |
| O(1)–Sm(1)–O(3)     | 115.4(10) | O(1)–Sm(1)–O(4)     | 137.5(8)  |
| O(1)–Sm(1)–O(5)     | 82.3(9)   | O(1)–Sm(1)–O(6)     | 142.8(9)  |

|                  |           |                  |           |
|------------------|-----------|------------------|-----------|
| O(1)–Sm(1)–O(7)  | 73.7(10)  | O(1)–Sm(1)–O(8)  | 74.7(10)  |
| O(2)–Sm(1)–O(3)  | 73.9(8)   | O(2)–Sm(1)–O(4)  | 75.6(8)   |
| O(2)–Sm(1)–O(5)  | 83.5(8)   | O(2)–Sm(1)–O(6)  | 147.0(8)  |
| O(2)–Sm(1)–O(7)  | 138.8(9)  | O(2)–Sm(1)–O(8)  | 111.5(10) |
| O(3)–Sm(1)–O(4)  | 76.9(9)   | O(3)–Sm(1)–O(5)  | 143.1(9)  |
| O(3)–Sm(1)–O(6)  | 85.6(9)   | O(3)–Sm(1)–O(7)  | 141.7(8)  |
| O(3)–Sm(1)–O(8)  | 71.2(10)  | O(4)–Sm(1)–O(5)  | 69.3(8)   |
| O(4)–Sm(1)–O(6)  | 74.8(8)   | O(4)–Sm(1)–O(7)  | 123.1(10) |
| O(4)–Sm(1)–O(8)  | 143.1(10) | O(5)–Sm(1)–O(6)  | 99.1(8)   |
| O(5)–Sm(1)–O(7)  | 72.6(8)   | O(5)–Sm(1)–O(8)  | 145.5(10) |
| O(6)–Sm(1)–O(7)  | 71.4(9)   | O(6)–Sm(1)–O(8)  | 84.9(9)   |
| O(7)–Sm(1)–O(8)  | 76.5(10)  | Sm(1)–O(1)–C(1)  | 131(2)    |
| Sm(1)–O(2)–C(4)  | 136(2)    | Sm(1)–O(3)–C(7)  | 139(2)    |
| Sm(1)–O(4)–C(10) | 133(2)    | Sm(1)–O(5)–C(13) | 136(2)    |
| Sm(1)–O(6)–C(16) | 144(3)    | Sm(1)–O(7)–C(19) | 136(3)    |
| Sm(1)–O(8)–C(22) | 140(3)    |                  |           |

Symmetry transformations used to generate equivalent atoms: #1  $-x, -y+1, -z$ ; #2  $-x, -y+1, -z+1$ .

**Table S4.** Selected Bond Lengths (Å) and Angles (deg) for **3**

|                   |           |                   |           |
|-------------------|-----------|-------------------|-----------|
| Pb(1)–I(1)#1      | 3.388(2)  | Pb(1)–I(1)        | 3.341(2)  |
| Pb(1)–I(2)        | 3.249(3)  | Pb(1)–I(3)        | 3.162(3)  |
| Pb(1)–I(4)        | 3.132(3)  | Pb(1)–I(5)        | 3.160(3)  |
| Pb(2)–I(1)        | 3.310(2)  | Pb(2)–I(4)#1      | 3.221(3)  |
| Pb(2)–I(5)#1      | 3.200(3)  | Pb(2)–I(6)        | 3.266(2)  |
| Pb(2)–I(7)        | 3.200(3)  | Pb(2)–I(8)        | 3.113(2)  |
| Pb(3)–I(1)        | 3.453(3)  | Pb(3)–I(2)        | 3.203(3)  |
| Pb(3)–I(3)        | 3.208(3)  | Pb(3)–I(6)        | 3.313(2)  |
| Pb(3)–I(9)        | 3.220(3)  | Pb(3)–I(10)       | 3.094(3)  |
| Pb(4)–I(6)        | 3.385(2)  | Pb(4)–I(9)        | 3.139(3)  |
| Pb(4)–I(10)       | 3.311(3)  | Pb(4)–I(11)       | 3.239(3)  |
| Pb(4)–I(11)#2     | 3.333(3)  | Pb(4)–I(12)       | 3.083(3)  |
| Pb(5)–I(6)        | 3.743(3)  | Pb(5)–I(7)        | 3.139(3)  |
| Pb(5)–I(8)        | 3.182(3)  | Pb(5)–I(11)       | 3.411(3)  |
| Pb(5)–I(12)#2     | 3.287(3)  | Pb(5)–I(13)       | 2.946(3)  |
| Gd(1)–O(1)        | 2.31(2)   | Gd(1)–O(2)        | 2.32(2)   |
| Gd(1)–O(3)        | 2.44(2)   | Gd(1)–O(4)        | 2.37(2)   |
| Gd(1)–O(5)        | 2.36(2)   | Gd(1)–O(6)        | 2.30(3)   |
| Gd(1)–O(7)        | 2.35(3)   | Gd(1)–O(8)        | 2.37(2)   |
|                   |           |                   |           |
| I(1)–Pb(1)–I(1)#1 | 91.49(6)  | I(1)#1–Pb(1)–I(2) | 92.28(7)  |
| I(1)–Pb(1)–I(2)   | 88.87(7)  | I(1)–Pb(1)–I(3)   | 86.79(7)  |
| I(1)#1–Pb(1)–I(3) | 177.45(7) | I(1)–Pb(1)–I(4)   | 175.83(7) |

|                     |           |                     |           |
|---------------------|-----------|---------------------|-----------|
| I(1)#1-Pb(1)-I(4)   | 86.56(7)  | I(1)-Pb(1)-I(5)     | 87.63(7)  |
| I(1)#1-Pb(1)-I(5)   | 83.72(7)  | I(2)-Pb(1)-I(3)     | 85.82(7)  |
| I(2)-Pb(1)-I(4)     | 94.89(7)  | I(2)-Pb(1)-I(5)     | 174.60(7) |
| I(3)-Pb(1)-I(4)     | 95.28(7)  | I(3)-Pb(1)-I(5)     | 98.08(8)  |
| I(4)-Pb(1)-I(5)     | 88.50(7)  | I(1)-Pb(2)-I(4)#1   | 86.48(6)  |
| I(1)-Pb(2)-I(5)#1   | 84.38(6)  | I(1)-Pb(2)-I(6)     | 94.51(6)  |
| I(1)-Pb(2)-I(7)     | 93.38(7)  | I(1)-Pb(2)-I(8)     | 177.42(7) |
| I(4)#1-Pb(2)-I(5)#1 | 86.29(7)  | I(4)-Pb(2)-I(6)     | 178.94(7) |
| I(4)#1-Pb(2)-I(7)   | 92.62(7)  | I(4)#1-Pb(2)-I(8)   | 94.68(7)  |
| I(5)#1-Pb(2)-I(6)   | 93.44(7)  | I(5)#1-Pb(2)-I(7)   | 177.57(8) |
| I(5)#1-Pb(2)-I(8)   | 93.38(7)  | I(6)-Pb(2)-I(7)     | 87.69(7)  |
| I(6)-Pb(2)-I(8)     | 84.32(6)  | I(7)-Pb(2)-I(8)     | 88.88(7)  |
| I(1)-Pb(3)-I(2)     | 87.68(6)  | I(1)-Pb(3)-I(3)     | 84.22(7)  |
| I(1)-Pb(3)-I(6)     | 91.06(6)  | I(1)-Pb(3)-I(9)     | 87.49(7)  |
| I(1)-Pb(3)-I(10)    | 173.65(7) | I(2)-Pb(3)-I(3)     | 85.84(7)  |
| I(2)-Pb(3)-I(6)     | 95.17(7)  | I(2)-Pb(3)-I(9)     | 174.87(8) |
| I(2)-Pb(3)-I(10)    | 98.56(7)  | I(3)-Pb(3)-I(6)     | 175.13(7) |
| I(3)-Pb(3)-I(9)     | 95.39(7)  | I(3)-Pb(3)-I(10)    | 97.30(7)  |
| I(6)-Pb(3)-I(9)     | 83.19(7)  | I(6)-Pb(3)-I(10)    | 87.27(7)  |
| I(9)-Pb(3)-I(10)    | 86.23(7)  | I(6)-Pb(4)-I(9)     | 83.25(7)  |
| I(6)-Pb(4)-I(10)    | 82.69(6)  | I(6)-Pb(4)-I(11)    | 92.47(7)  |
| I(6)-Pb(4)-I(11)#2  | 87.80(7)  | I(6)-Pb(4)-I(12)    | 171.45(8) |
| I(9)-Pb(4)-I(10)    | 83.95(7)  | I(9)-Pb(4)-I(11)    | 93.98(7)  |
| I(9)-Pb(4)-I(11)#2  | 170.51(7) | I(9)-Pb(4)-I(12)    | 97.12(7)  |
| I(10)-Pb(4)-I(11)   | 174.92(7) | I(10)-Pb(4)-I(11)#2 | 98.09(7)  |
| I(10)-Pb(4)-I(12)   | 88.84(8)  | I(11)-Pb(4)-I(11)#2 | 83.21(7)  |
| I(11)-Pb(4)-I(12)   | 96.02(8)  | I(11)#2-Pb(4)-I(12) | 92.20(7)  |
| I(6)-Pb(5)-I(7)     | 80.70(7)  | I(6)-Pb(5)-I(8)     | 75.94(6)  |
| I(6)-Pb(5)-I(11)    | 83.82(6)  | I(6)-Pb(5)-I(12)#2  | 96.13(7)  |
| I(6)-Pb(5)-I(13)    | 167.15(8) | I(7)-Pb(5)-I(8)     | 88.75(7)  |
| I(7)-Pb(5)-I(11)    | 89.47(7)  | I(7)-Pb(5)-I(12)#2  | 175.73(8) |
| I(7)-Pb(5)-I(13)    | 94.73(10) | I(8)-Pb(5)-I(11)    | 159.70(7) |
| I(8)-Pb(5)-I(12)#2  | 93.26(7)  | I(8)-Pb(5)-I(13)    | 92.04(8)  |
| I(11)-Pb(5)-I(12)#2 | 87.34(7)  | I(11)-Pb(5)-I(13)   | 108.26(9) |
| I(12)#2-Pb(5)-I(13) | 88.96(10) | Pb(1)-I(1)-Pb(1)#1  | 88.52(6)  |
| Pb(1)-I(1)-Pb(2)    | 130.07(7) | Pb(1)#1-I(1)-Pb(2)  | 72.95(5)  |
| Pb(1)-I(1)-Pb(3)    | 71.97(5)  | Pb(1)#1-I(1)-Pb(3)  | 130.59(7) |
| Pb(2)-I(1)-Pb(3)    | 85.64(6)  | Pb(1)-I(2)-Pb(3)    | 76.47(6)  |
| Pb(1)-I(3)-Pb(3)    | 77.63(6)  | Pb(1)-I(4)-Pb(2)#1  | 77.62(6)  |
| Pb(1)-I(5)-Pb(2)#1  | 77.52(6)  | Pb(2)-I(6)-Pb(3)    | 88.65(6)  |
| Pb(2)-I(6)-Pb(4)    | 130.72(8) | Pb(2)-I(6)-Pb(5)    | 71.27(5)  |
| Pb(3)-I(6)-Pb(4)    | 75.25(5)  | Pb(3)-I(6)-Pb(5)    | 134.79(7) |

|                     |          |                     |           |
|---------------------|----------|---------------------|-----------|
| Pb(4)–I(6)–Pb(5)    | 87.69(6) | Pb(2)–I(7)–Pb(5)    | 80.64(7)  |
| Pb(2)–I(8)–Pb(5)    | 81.33(6) | Pb(3)–I(9)–Pb(4)    | 80.04(7)  |
| Pb(3)–I(10)–Pb(4)   | 79.29(6) | Pb(4)–I(11)–Pb(4)#2 | 96.79(7)  |
| Pb(4)–I(11)–Pb(5)   | 96.02(7) | Pb(4)#2–I(11)–Pb(5) | 86.96(7)  |
| Pb(4)–I(12)–Pb(5)#2 | 93.49(7) | O(1)–Gd(1)–O(2)     | 84.6(9)   |
| O(1)–Gd(1)–O(3)     | 73.6(8)  | O(1)–Gd(1)–O(4)     | 145.5(9)  |
| O(1)–Gd(1)–O(5)     | 98.2(8)  | O(1)–Gd(1)–O(6)     | 143.4(10) |
| O(1)–Gd(1)–O(7)     | 71.4(10) | O(1)–Gd(1)–O(8)     | 84.9(8)   |
| O(2)–Gd(1)–O(3)     | 75.4(10) | O(2)–Gd(1)–O(4)     | 74.3(8)   |
| O(2)–Gd(1)–O(5)     | 143.3(9) | O(2)–Gd(1)–O(6)     | 116.9(12) |
| O(2)–Gd(1)–O(7)     | 139.9(9) | O(2)–Gd(1)–O(8)     | 70.7(10)  |
| O(3)–Gd(1)–O(4)     | 74.9(9)  | O(3)–Gd(1)–O(5)     | 70.5(8)   |
| O(3)–Gd(1)–O(6)     | 138.0(9) | O(3)–Gd(1)–O(7)     | 124.4(9)  |
| O(3)–Gd(1)–O(8)     | 141.2(9) | O(4)–Gd(1)–O(5)     | 84.0(8)   |
| O(4)–Gd(1)–O(6)     | 71.1(10) | O(4)–Gd(1)–O(7)     | 140.3(9)  |
| O(4)–Gd(1)–O(8)     | 112.3(9) | O(5)–Gd(1)–O(6)     | 82.0(11)  |
| O(5)–Gd(1)–O(7)     | 73.5(9)  | O(5)–Gd(1)–O(8)     | 146.0(9)  |
| O(6)–Gd(1)–O(7)     | 73.7(11) | O(6)–Gd(1)–O(8)     | 76.1(10)  |
| O(7)–Gd(1)–O(8)     | 75.5(10) | Gd(1)–O(1)–C(1)     | 145(3)    |
| Gd(1)–O(2)–C(4)     | 145(2)   | Gd(1)–O(3)–C(7)     | 134(2)    |
| Gd(1)–O(4)–C(10)    | 140(3)   | Gd(1)–O(5)–C(13)    | 138(2)    |
| Gd(1)–O(6)–C(16)    | 133(3)   | Gd(1)–O(7)–C(19)    | 133(3)    |
| Gd(1)–O(8)–C(22A)   | 142(2)   | Gd(1)–O(8)–C(22B)   | 155(2)    |

**Table S5.** Hydrogen Bond Lengths (Å) and Angles (deg) for **1-3**

| D–H···A               | d(H···A) | d(D···A) | <(DHA) |
|-----------------------|----------|----------|--------|
| <b>1</b>              |          |          |        |
| C(3)–H(3C)···I(3)#1   | 3.014    | 3.917    | 157.32 |
| C(7)–H(7)···I(4)#2    | 3.019    | 3.759    | 137.67 |
| C(9)–H(9A)···I(9)#3   | 3.241    | 3.892    | 126.72 |
| C(11)–H(11A)···O(6)#4 | 2.605    | 3.432    | 144.55 |
| C(16)–H(16)···O(5)    | 2.622    | 3.139    | 115.69 |
| <b>2</b>              |          |          |        |
| C(3)–H(3B)···I(13)#1  | 2.996    | 3.953    | 175.51 |
| C(5)–H(5B)···I(6)#2   | 3.251    | 4.197    | 169.02 |
| C(6)–H(6A)···I(12)#3  | 3.152    | 4.023    | 151.67 |
| C(6)–H(6C)···I(10)#2  | 3.286    | 4.084    | 141.90 |
| C(7)–H(7)···I(10)#4   | 3.212    | 3.890    | 131.40 |
| C(9)–H(9A)···I(10)#4  | 3.086    | 3.951    | 150.72 |
| C(9)–H(9B)···I(7)#2   | 3.219    | 4.139    | 161.13 |
| C(14)–H(14B)···I(8)#5 | 3.219    | 3.955    | 134.80 |
| C(15)–H(15B)···I(4)#6 | 3.289    | 4.146    | 149.57 |



|                      |       |       |        |
|----------------------|-------|-------|--------|
| C(16)–H(16)⋯I(10)#4  | 3.222 | 4.004 | 142.97 |
| C(17)–H(17B)⋯I(2)#7  | 3.125 | 3.840 | 132.58 |
| C(20)–H(20C)⋯I(9)#7  | 3.187 | 4.020 | 146.17 |
| C(24)–H(24C)⋯I(11)#1 | 2.911 | 3.722 | 142.90 |
| <b>3</b>             |       |       |        |
| C(1)–H(1)⋯I(8)#1     | 3.159 | 3.991 | 149.93 |
| C(2)–H(2B)⋯I(1)#2    | 3.121 | 3.918 | 141.57 |
| C(3)–H(3A)⋯I(7)#1    | 3.037 | 3.906 | 151.32 |
| C(3)–H(3B)⋯I(3)#2    | 3.266 | 4.035 | 138.41 |
| C(4)–H(4)⋯I(8)#1     | 3.298 | 3.910 | 125.39 |
| C(6)–H(6A)⋯I(8)#1    | 3.206 | 3.966 | 137.46 |
| C(6)–H(7)⋯O(1)       | 2.476 | 2.984 | 114.51 |
| C(11)–H(11B)⋯I(6)#3  | 3.307 | 4.235 | 163.17 |
| C(12)–H(12A)⋯I(13)#4 | 3.046 | 3.938 | 155.08 |
| C(17)–H(17B)⋯I(12)#5 | 3.104 | 4.033 | 163.30 |
| C(18)–H(18C)⋯I(2)#6  | 3.250 | 3.831 | 120.79 |
| C(19)–H(19)⋯O(5)     | 2.539 | 3.007 | 111.49 |
| C(21)–H(21A)⋯I(9)#2  | 3.144 | 4.081 | 165.71 |

Symmetry transformations used to generate equivalent atoms: For **1**: #1  $-x, -y+1, -z+1$ ; #2  $x, y-1, z$ ; #3  $x, -y+1/2, z+1/2$ ; #4  $x, -y+1/2, z-1/2$ . For **2**: #1  $x+1/2, -y+1/2, z-1/2$ ; #2  $-x+1/2, y-1/2, -z+1/2$ ; #3  $-x+1, -y+1, -z+1$ ; #4  $x+1, y-1, z$ ; #5  $x+1, y, z$ ; #6  $x+3/2, -y+1/2, z+1/2$ ; #7  $-x+3/2, y-1/2, -z+1/2$ . For **3**: #1  $x+1, y-1, z$ ; #2  $-x+3/2, y-1/2, -z+1/2$ ; #3  $-x+1/2, y-1/2, -z+1/2$ ; #4  $-x+1, -y+1, -z+1$ ; #5  $x+1/2, -y+1/2, z-1/2$ ; #6  $x+1, y, z$ .

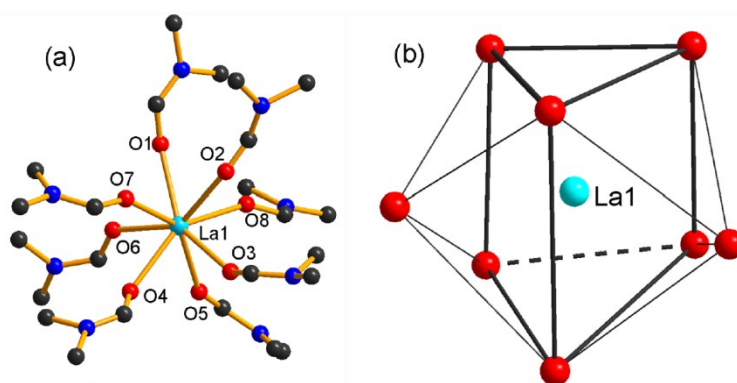

**Fig. S1** (a) Crystal structure of the  $[\text{La}(\text{DMF})_8]^{3+}$  with the labelling scheme in **1**. (b) The dicapped trigonal prism  $\text{LaO}_8$  of in the  $[\text{La}(\text{DMF})_8]^{3+}$  complex cation.

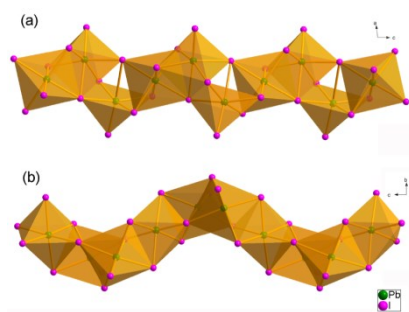

**Fig. S2** (a) Crystal structure of the 1-D  $[\text{Pb}_3\text{I}_9]_n^{3n-}$  chain in **1** viewed along the  $b$  (a) and  $a$  (b) axis.

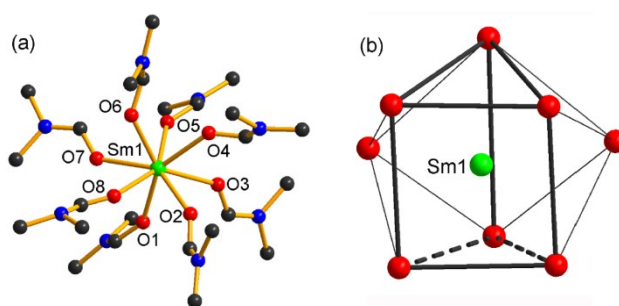

**Fig. S3** (a) Crystal structure of the  $[\text{Sm}(\text{DMF})_8]^{3+}$  with the labelling scheme in **2**. (b) The dicapped trigonal prism  $\text{SmO}_8$  of in the  $[\text{Sm}(\text{DMF})_8]^{3+}$  complex cation.

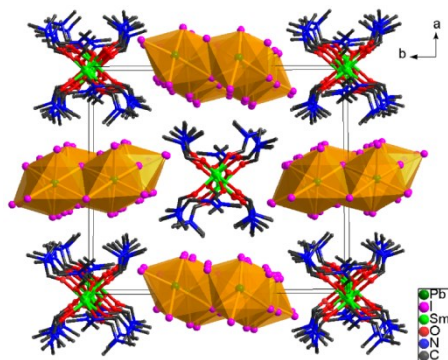

**Fig. S4** Packing diagram of **2** viewed along the  $c$  axis. Yellow octahedron:  $\text{PbI}_6$ .

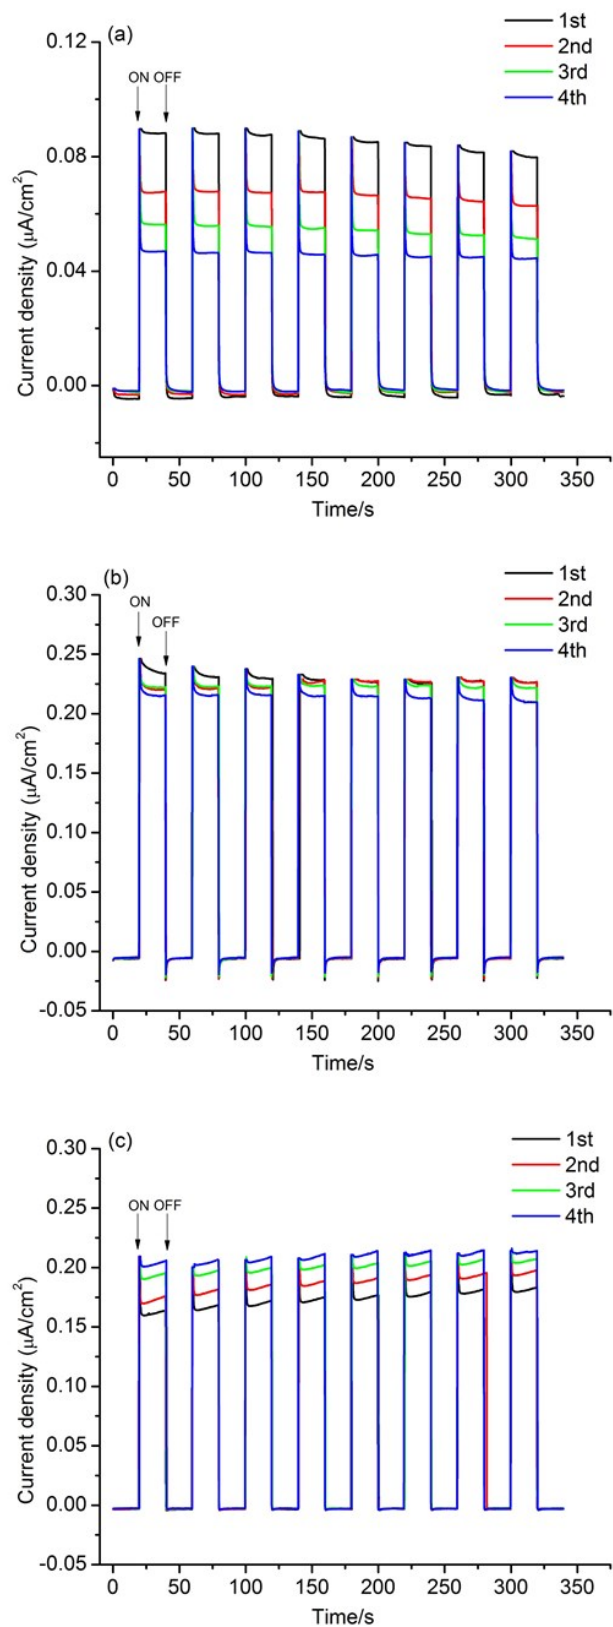

**Fig. S5.** The photocurrent response behaviours of **1** (a), **2** (b) and **3** (c).

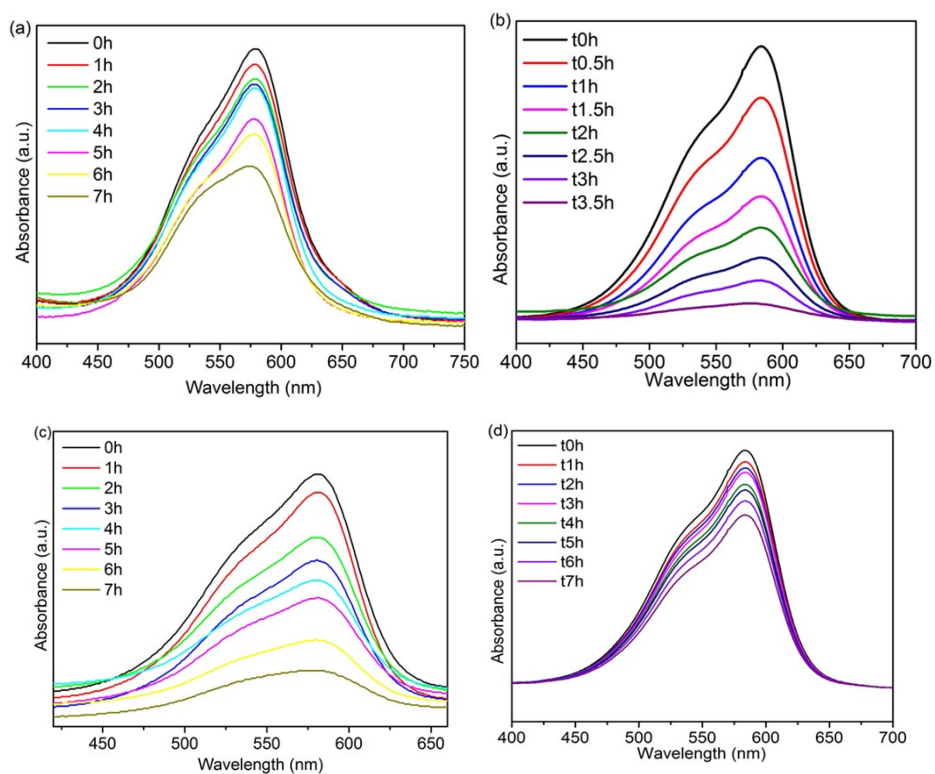

**Fig. S6.** Time dependent absorption spectra of CV solution with photodegradation catalyzed by compounds **1** (a), **2** (b), **3** (c) and  $\text{PbI}_2$  (d).

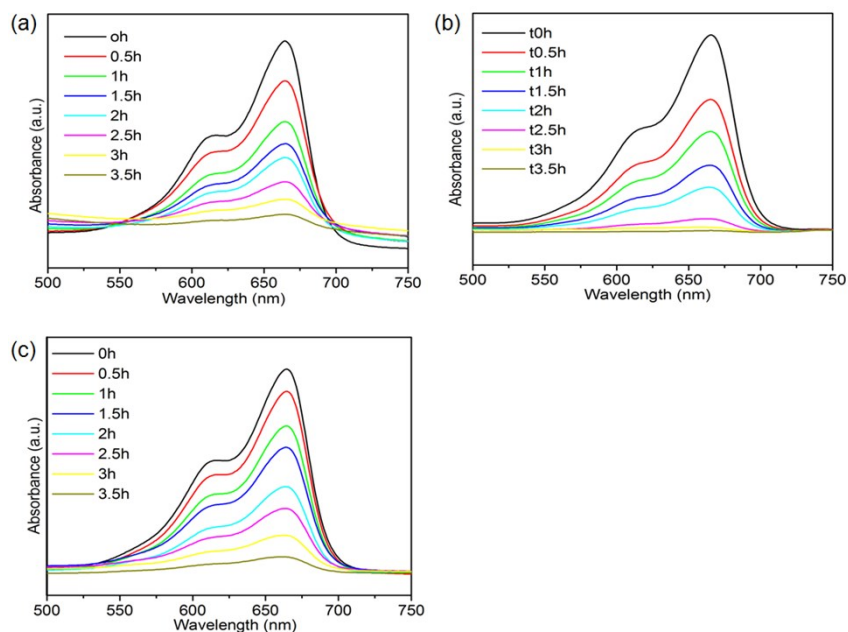

**Fig. S7.** Time dependent absorption spectra of MB solution with photodegradation catalyzed by compounds **1** (a), **2** (b), and **3** (c).

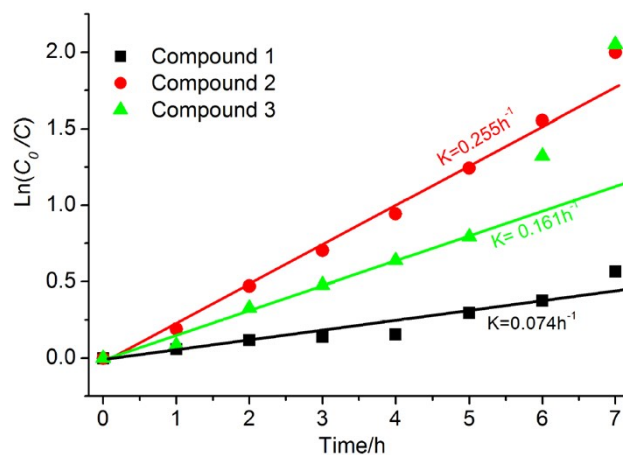

Fig. S8. The linear relationship of  $\ln(C_0/C)$  via reaction time over compounds 1(a), 2(b), 3(c) in the photodegradation of CV.

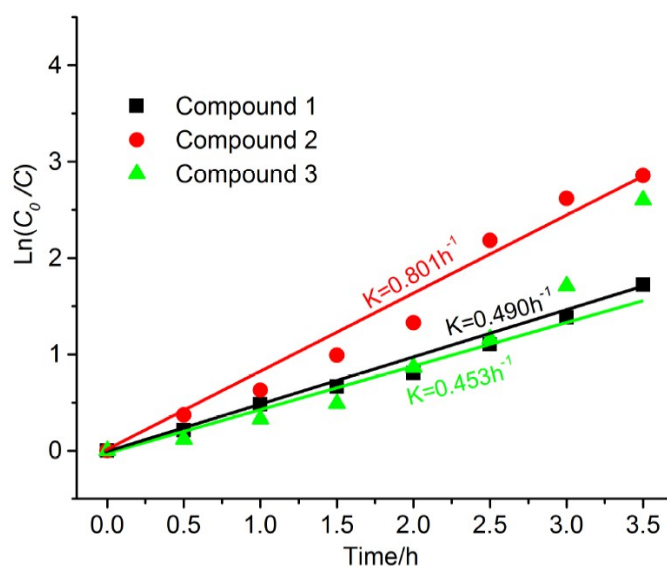

Fig. S9. The linear relationship of  $\ln(C_0/C)$  over reaction time over compounds 1, 2 and 3 in the photodegradation of MB.

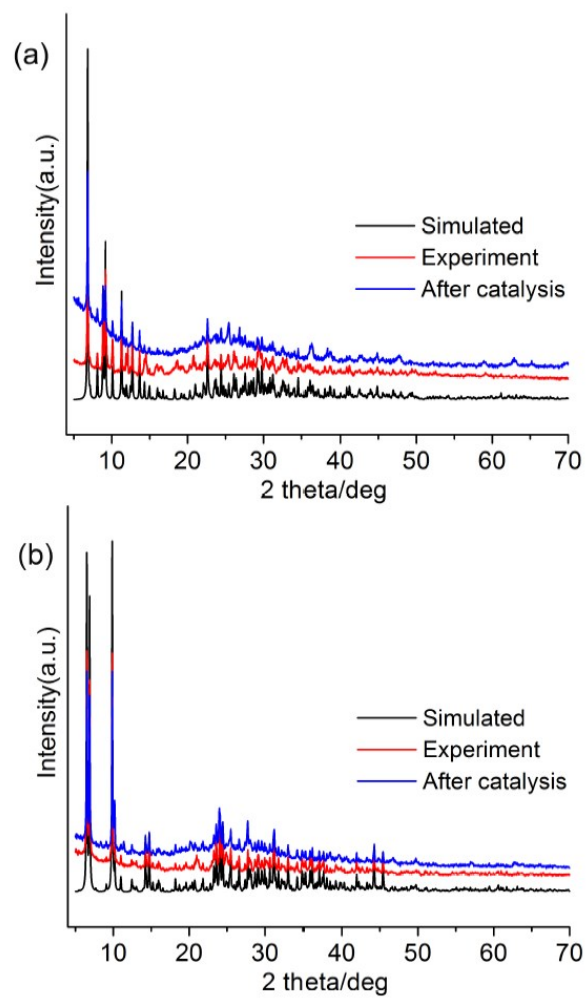

**Fig. S10.** Simulated and experimental powder XRD patterns of compounds **1** (a), and **2** (b).

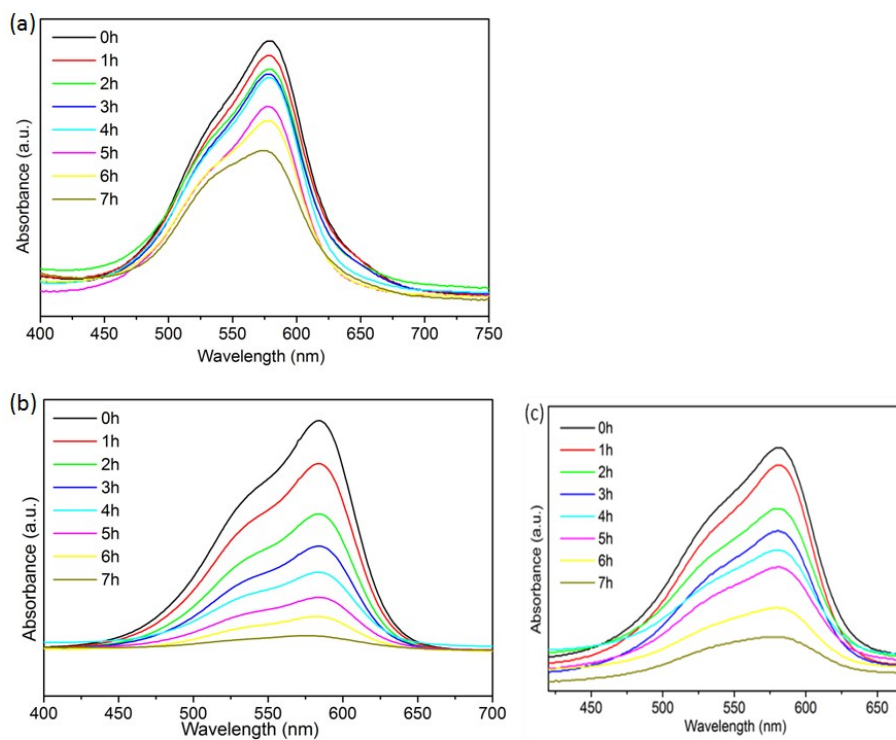

**Fig. S11.** Time dependent absorption spectra of CV solution with photodegradation catalyzed by compound **2** in the presence of BQ (a), AO (b), and TBA (c).

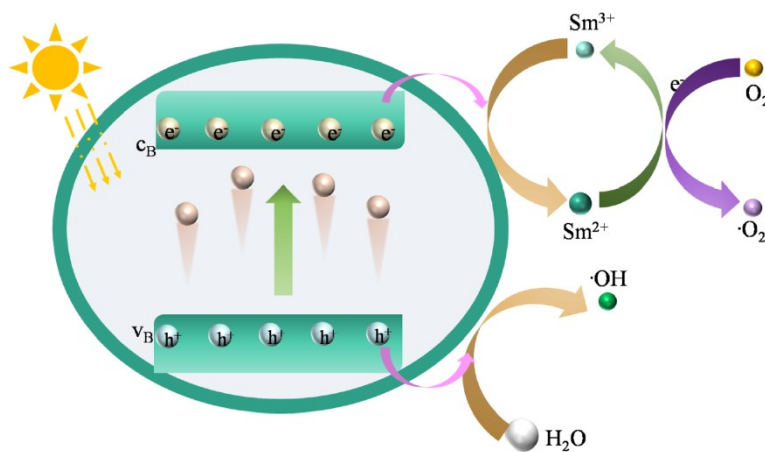

**Fig. S12.** Proposed reaction mechanism for photocatalytic degradation of CV over catalyst **2** under visible light irradiation.

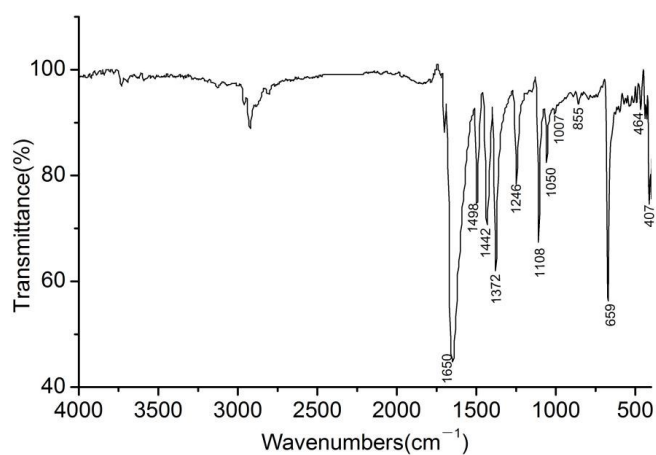

**Fig. S13.** IR spectrum of complex 1.

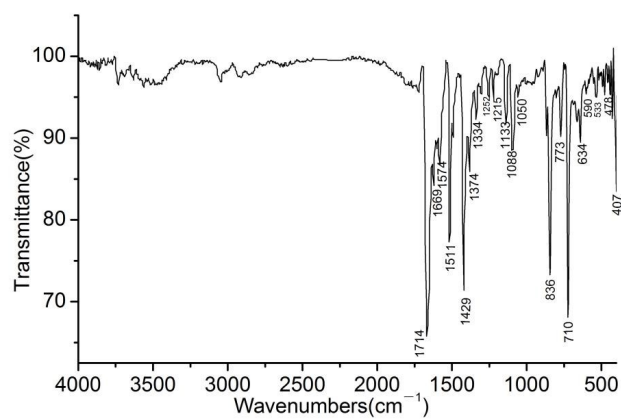

**Fig. S14.** IR spectrum of complex 2.

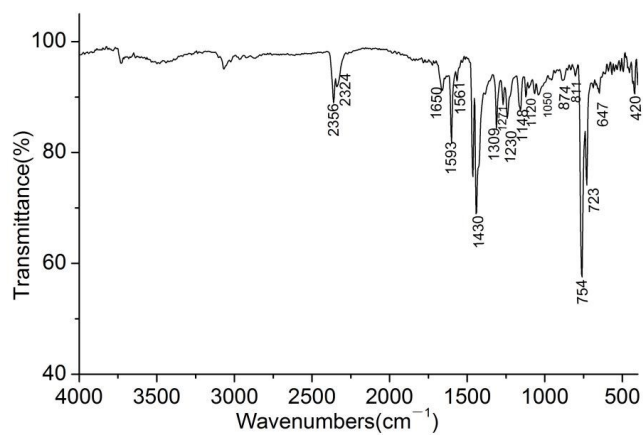

**Fig. S15.** IR spectrum of complex 3.



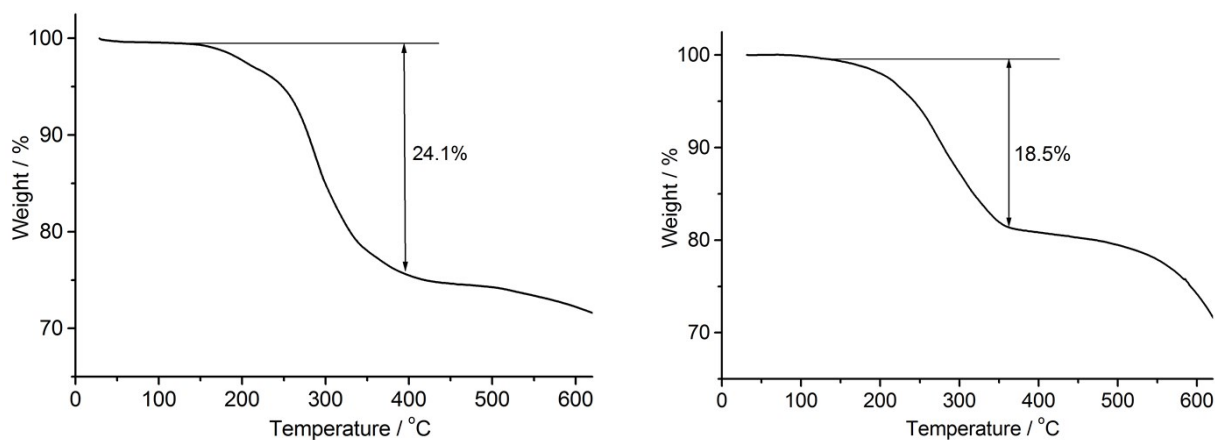

**Fig. S16.** TGA curves of compounds **1** (left), and **2** (right).

The thermal properties of the compounds **1** and **2** were investigated by thermogravimetric analysis (TGA), and the test were carried out under nitrogen atmosphere in the temperature from 25°C to 620°C (Fig. S16). Compound **1** displayed a weight loss of about 24.1% in one step between 150°C and 395 °C, which is in good accordance with the theoretical mass loss of 23.5% for the DMF ligands. Compound **2** exhibits a similar thermo decomposition with a weight loss of 18.5% in the temperature range of 140–360 °C, which corresponds the removal of DMF ligands (theoretical value of 17.1%).
